# Supplementary material for: The effect of an electron-withdrawing group in the imidazolium cation: the case of nitro-functionalized imidazolium salts as acidic catalysts for the acetylation of glycerol
Source: Royal Society of Chemistry journal article supplement (doi:10.1039/c8nj02520g), 2018-01-01
Supplement: c8nj02520g1.pdf [file c8nj02520g1.pdf]

## Supporting Information

# The effect of an electron-withdrawing group in the imidazolium cation: the case of nitro-functionalized imidazolium salts as acidic catalysts for the acetylation of glycerol

Eduardo M. Morais,<sup>a</sup> Igor B. Grillo,<sup>b</sup> Hubert K. Stassen,<sup>a</sup> Marcus Seferin<sup>c</sup> and

Jackson D. Scholten<sup>a\*</sup>

<sup>a</sup>Instituto de Química, UFRGS, Av. Bento Gonçalves, 9500, 91501-970, Agronomia, Porto Alegre-RS, Brazil.

\*Corresponding author: [jackson.scholten@ufrgs.br](mailto:jackson.scholten@ufrgs.br)

<sup>b</sup>Departamento de Química, UFPB, Cidade Universitária, 58051-900, Castelo Branco, João Pessoa-PB, Brazil.

<sup>c</sup>Faculdade de Química, PUCRS, Av. Ipiranga, 6681, 90619-900, Partenon, Porto Alegre-RS, Brazil.

## 1. Theoretical calculations

The conceptual density functional theory (CDFT) provides several descriptors that can give information about the reactivity of a system, based only in *ab initio* calculations using a chemical structure.<sup>1</sup> These descriptors can be employed as quantitative and semi-quantitative indices of reactivity, and can help to rationalize chemical interactions in reactional systems. They are mathematically derived coefficients from the DFT formulism that comprehend physical and chemical meanings explored by the theories of Mulliken, Fukui and Pearson.<sup>2</sup> The rationalization of the effects relevant to a chemical reaction used in the CDFT works with descriptors of electron transfer tendencies, polarizability and energy variation in function of the electron density changes. The reaction descriptors originate from the total differential equation of electronic energy ( $dE$ ) in function to the variation of the number of electrons ( $dN$ ) and the external electrostatic potential ( $dv$ ), as represented in Equation 1, where “ $r$ ” is a three-dimensional space variable.

$$\text{Eq. 1 } dE = \mu dN + \int \rho(r) dv(r) dr$$

For this work, the following descriptors were calculated:<sup>3</sup> I) The chemical hardness, which is the second derivative of the energy in respect to the change in the number of electrons (Eq. 2), represent the electron escape resistance and resistance to change the polarizations of electronic density. II) The electrophilicity, which is the stabilization energy of a system that has received electron density (Eq. 3). III) The electronegativity, which describes the tendency to receive electron density (Eq. 4). IV) Another descriptor was calculated using the previously described descriptors, the net electron transfer from one chemical system to another (Eq. 5).

$$\text{Eq. 2 } \eta = \left( \frac{\partial^2 E}{\partial N^2} \right)_v \approx \frac{E_{LUMO} - E_{HOMO}}{2}$$

$$\text{Eq. 3 } \omega = \frac{\chi^2}{2\eta}$$

$$\text{Eq. 4 } \chi = -\frac{E_{HOMO} + E_{LUMO}}{2}$$

$$\text{Eq. 5 } \Delta N = \frac{\chi_a - \chi_b}{2(\eta_a + \eta_b)}$$

The counterpoise correction<sup>4</sup> was used to correct basis set sobreposition errors (BSSE). A simple step by step description of this method can be found in the ORCA Manual.<sup>5</sup>

## 2. Computational data

Three-dimensional structures optimized at the B3LYP-D3/6-31+G\* level used in this study and their energies.

Glycerol

```
C -1.303759  0.343324 -0.238812
C -0.026507 -0.359196 -0.718530
H -0.045193 -0.425931 -1.815574
O  0.020619 -1.692360 -0.204686
H -2.182769 -0.123717 -0.693412
H -1.285221  1.403683 -0.531052
O -1.469685  0.195642  1.171399
C  1.245096  0.388561 -0.306615
H  2.125804 -0.123053 -0.716287
O  1.357106  0.502904  1.119969
H  1.228660  1.414112 -0.690423
H -0.565063 -1.709993  0.574530
H  1.569020 -0.381364  1.461928
H -0.668109  0.567383  1.587565
```

Energy = -344.622247867358 E<sub>h</sub>

Acetic Acid

```
C  0.158490  0.277732 -0.026273
O  1.365734  0.260636 -0.143452
O -0.576526 -0.862053  0.078418
C -0.712822  1.505482  0.022861
H  0.049435 -1.610307  0.038085
H -0.091739  2.398009 -0.061746
H -1.274836  1.527402  0.963181
H -1.443001  1.477930 -0.793880
```

Energy = -228.980808056332 E<sub>h</sub>

Acetic anhydride

|   |           |          |           |
|---|-----------|----------|-----------|
| C | -0.486919 | 3.618103 | -0.595721 |
| C | 0.766148  | 4.435202 | -0.749487 |
| H | -1.291189 | 4.247684 | -0.211607 |
| H | -0.310773 | 2.771633 | 0.076147  |
| H | -0.772347 | 3.208823 | -1.572066 |
| O | 1.850335  | 3.602152 | -1.037026 |
| O | 0.878179  | 5.622254 | -0.608213 |
| C | 2.935697  | 4.070156 | -1.781960 |
| C | 4.187451  | 3.334720 | -1.390341 |
| O | 2.825711  | 4.907414 | -2.635556 |
| H | 4.470621  | 3.621937 | -0.370597 |
| H | 4.993254  | 3.587783 | -2.081396 |
| H | 4.010812  | 2.253773 | -1.389286 |

Energy = -381.553988633430 E<sub>h</sub>

[Hmim]Cl

|    |           |           |           |
|----|-----------|-----------|-----------|
| N  | 1.089881  | 1.126065  | 0.122072  |
| C  | 1.465612  | -0.129930 | -0.060408 |
| N  | 0.382815  | -0.939290 | -0.016543 |
| C  | -0.729978 | -0.142779 | 0.205573  |
| C  | -0.272715 | 1.147120  | 0.290702  |
| H  | -1.721507 | -0.562902 | 0.282386  |
| H  | 2.480700  | -0.462114 | -0.222838 |
| H  | 1.849514  | 2.067678  | 0.142630  |
| C  | 0.382600  | -2.389427 | -0.181422 |
| H  | 1.412754  | -2.731452 | -0.295550 |
| H  | -0.056035 | -2.865711 | 0.699908  |
| H  | -0.188538 | -2.667160 | -1.072033 |
| Cl | 2.908524  | 3.300626  | 0.191492  |
| H  | -0.804308 | 2.071374  | 0.459932  |

Energy = -726.135021234702 E<sub>h</sub>

[Hmim][TsO]

|   |           |           |           |
|---|-----------|-----------|-----------|
| N | -0.476881 | -2.721664 | -0.541314 |
| C | 0.816285  | -2.951317 | -0.746350 |
| N | 0.946898  | -4.102326 | -1.433980 |
| C | -0.321196 | -4.617450 | -1.669944 |
| C | -1.208362 | -3.742988 | -1.102956 |
| H | -0.469288 | -5.542690 | -2.204948 |
| H | 1.596207  | -2.289023 | -0.388537 |

|   |           |           |           |
|---|-----------|-----------|-----------|
| H | -0.819467 | -1.837501 | 0.027664  |
| C | 2.210392  | -4.702185 | -1.854365 |
| H | 2.311229  | -5.700166 | -1.420114 |
| H | 2.248134  | -4.768168 | -2.945310 |
| H | 3.029140  | -4.072775 | -1.502065 |
| C | -0.349632 | 5.984311  | 0.746720  |
| C | -0.220833 | 4.487747  | 0.909444  |
| C | -0.052637 | 3.920616  | 2.181037  |
| C | -0.273516 | 3.630529  | -0.199891 |
| C | 0.059708  | 2.539148  | 2.346969  |
| C | 0.002970  | 1.708697  | 1.227691  |
| C | -0.162488 | 2.248103  | -0.048332 |
| H | -1.268503 | 6.357205  | 1.218339  |
| H | 0.490505  | 6.510458  | 1.217353  |
| H | -0.376801 | 6.270972  | -0.309852 |
| H | -0.403102 | 4.051445  | -1.194719 |
| H | -0.007920 | 4.568255  | 3.054531  |
| H | 0.189575  | 2.096313  | 3.328973  |
| H | -0.203444 | 1.592274  | -0.912726 |
| S | 0.173987  | -0.067164 | 1.432888  |
| O | 0.286603  | -0.327665 | 2.879515  |
| O | 1.353431  | -0.480638 | 0.608427  |
| O | -1.105655 | -0.637512 | 0.814495  |
| H | -2.286469 | -3.768031 | -1.053118 |

Energy = -1160.490999921606 E<sub>h</sub>

[NO<sub>2</sub>Hmim]Cl

|    |           |           |           |
|----|-----------|-----------|-----------|
| N  | 0.940591  | 1.180510  | 0.037876  |
| C  | 1.367608  | -0.064022 | -0.019842 |
| N  | 0.325607  | -0.955918 | -0.050256 |
| C  | -0.835482 | -0.226125 | -0.009602 |
| C  | -0.420174 | 1.086198  | 0.043816  |
| N  | -1.277853 | 2.244139  | 0.101370  |
| H  | -1.818841 | -0.669328 | -0.021124 |
| H  | 2.404212  | -0.371563 | -0.041979 |
| H  | 2.208193  | 2.519017  | 0.009959  |
| O  | -2.495691 | 2.022657  | 0.101163  |
| O  | -0.751341 | 3.351618  | 0.146158  |
| C  | 0.429814  | -2.410790 | -0.114174 |
| H  | 1.486529  | -2.683674 | -0.129631 |
| H  | -0.043576 | -2.861207 | 0.762753  |
| H  | -0.049843 | -2.783346 | -1.023633 |
| Cl | 3.347709  | 3.191631  | -0.042350 |

Energy = -930.557571821164 E<sub>h</sub>

[NO<sub>2</sub>Hmim][TsO]

|   |           |           |           |
|---|-----------|-----------|-----------|
| N | -0.527349 | -2.677778 | -0.749790 |
| C | 0.739124  | -2.930668 | -1.020618 |
| N | 0.916471  | -4.237872 | -1.391580 |
| C | -0.311906 | -4.849904 | -1.354766 |
| C | -1.180301 | -3.858930 | -0.954156 |
| N | -2.600937 | -3.995801 | -0.763742 |
| H | -0.470408 | -5.887568 | -1.601806 |
| H | 1.537452  | -2.202824 | -0.954302 |
| H | -0.998011 | -1.113691 | -0.110436 |
| O | -3.232464 | -3.003993 | -0.407192 |
| O | -3.080467 | -5.116309 | -0.978657 |
| C | 2.185252  | -4.864478 | -1.751103 |
| H | 2.149364  | -5.226657 | -2.782251 |
| H | 2.977061  | -4.118299 | -1.660139 |
| H | 2.397746  | -5.696663 | -1.074667 |
| C | -0.439419 | 6.260542  | 1.221268  |
| C | -0.215200 | 4.771943  | 1.108370  |
| C | -0.134283 | 3.963372  | 2.249255  |
| C | -0.086289 | 4.167737  | -0.154567 |
| C | 0.064845  | 2.584606  | 2.145801  |
| C | 0.186346  | 2.017226  | 0.879577  |
| C | 0.113691  | 2.796029  | -0.278755 |
| H | -1.401595 | 6.547857  | 0.777964  |
| H | -0.440561 | 6.586792  | 2.265928  |
| H | 0.340903  | 6.820494  | 0.691509  |
| H | -0.142727 | 4.782394  | -1.050164 |
| H | -0.227994 | 4.415008  | 3.233733  |
| H | 0.129820  | 1.956335  | 3.027827  |
| H | 0.220086  | 2.332064  | -1.254072 |
| S | 0.441536  | 0.261601  | 0.736073  |
| O | 0.738776  | -0.296196 | 2.058417  |
| O | 1.386939  | -0.013345 | -0.363169 |
| O | -1.035502 | -0.173024 | 0.260205  |

Energy = -1364.915772313801 E<sub>h</sub>

[HSO<sub>3</sub>-pmim][BF<sub>4</sub>]

|   |           |           |          |
|---|-----------|-----------|----------|
| N | -0.948864 | -0.003213 | 1.525815 |
| C | -0.465644 | -1.131195 | 0.988768 |
| N | -1.320786 | -2.125842 | 1.247173 |
| C | -2.386345 | -1.623997 | 1.977404 |
| C | -2.153218 | -0.291285 | 2.152591 |
| H | -2.732629 | 0.470368  | 2.650879 |
| H | -3.208340 | -2.247900 | 2.292485 |
| H | 0.420892  | -1.248411 | 0.378905 |

|   |           |           |           |
|---|-----------|-----------|-----------|
| C | -0.345977 | 1.340382  | 1.391424  |
| C | -1.172386 | -3.493236 | 0.733194  |
| H | -2.064324 | -3.755132 | 0.159450  |
| H | -1.038272 | -4.187804 | 1.566026  |
| H | -0.304646 | -3.514347 | 0.072046  |
| H | -1.179176 | 2.039733  | 1.272929  |
| C | 0.591727  | 1.404794  | 0.186766  |
| H | 0.173991  | 1.579928  | 2.325853  |
| H | 0.068564  | 1.006609  | -0.686723 |
| H | 1.476825  | 0.782210  | 0.357261  |
| C | 1.045451  | 2.832716  | -0.099061 |
| S | 2.282008  | 2.857436  | -1.433329 |
| H | 1.549480  | 3.299458  | 0.754587  |
| H | 0.226617  | 3.479196  | -0.427873 |
| O | 2.543859  | 4.253624  | -1.762252 |
| O | 1.448628  | 2.238524  | -2.668122 |
| O | 3.361291  | 1.945019  | -1.049594 |
| H | 1.494445  | 1.241723  | -2.691721 |
| B | 0.519092  | -1.446545 | -2.271995 |
| F | 0.254865  | -2.394462 | -3.234065 |
| F | 1.353469  | -0.406480 | -2.779344 |
| F | 1.189879  | -2.040672 | -1.152483 |
| F | -0.680474 | -0.861196 | -1.776986 |

Energy = -1431.858508884429 E<sub>h</sub>

[HSO<sub>3</sub>-pmim][H<sub>2</sub>PO<sub>4</sub>]

|   |           |           |           |
|---|-----------|-----------|-----------|
| N | 2.699344  | 1.116987  | -0.354960 |
| C | 1.893086  | 0.353405  | 0.391706  |
| N | 1.079661  | 1.155256  | 1.093048  |
| C | 1.370924  | 2.473572  | 0.781018  |
| C | 2.393738  | 2.449021  | -0.123504 |
| H | 2.921563  | 3.248751  | -0.619012 |
| H | 0.830062  | 3.297731  | 1.219167  |
| H | 1.806839  | -0.727933 | 0.383421  |
| C | 3.666100  | 0.585969  | -1.324873 |
| C | -0.082165 | 0.667171  | 1.859609  |
| H | 0.147320  | -0.357031 | 2.156959  |
| C | -1.332574 | 0.687399  | 0.976220  |
| H | -0.180281 | 1.293191  | 2.751642  |
| H | -1.603663 | 1.712772  | 0.704818  |
| C | -2.509589 | 0.006584  | 1.671059  |
| H | -1.092625 | 0.154207  | 0.054834  |
| S | -3.859182 | -0.333114 | 0.496368  |
| H | -2.958599 | 0.627197  | 2.453394  |
| H | -2.237640 | -0.964320 | 2.094408  |
| O | -5.065456 | -0.631182 | 1.261595  |

|   |           |           |           |
|---|-----------|-----------|-----------|
| O | -3.402919 | -1.728753 | -0.169122 |
| O | -3.854227 | 0.730224  | -0.515965 |
| H | -2.621688 | -1.614301 | -0.784570 |
| H | 4.576566  | 0.269017  | -0.809330 |
| H | 3.903855  | 1.376870  | -2.038037 |
| H | 3.185330  | -0.253319 | -1.837110 |
| P | 0.281450  | -2.073112 | -1.267836 |
| O | -1.216059 | -1.452694 | -1.717159 |
| O | 1.350035  | -1.369912 | -2.076649 |
| O | 0.260635  | -1.994853 | 0.236077  |
| O | 0.162001  | -3.629317 | -1.765823 |
| H | 0.771045  | -3.778057 | -2.507406 |
| H | -1.282889 | -1.297433 | -2.673988 |

Energy = -1650.921557836709 E<sub>h</sub>

[HSO<sub>3</sub>-pmim][TsO]

|   |           |           |           |
|---|-----------|-----------|-----------|
| N | -1.902178 | 1.066475  | -1.453341 |
| C | -2.105449 | 1.254335  | -0.143784 |
| N | -3.330223 | 0.799187  | 0.162268  |
| C | -3.914674 | 0.289833  | -0.988082 |
| C | -3.015659 | 0.454915  | -1.999605 |
| H | -3.063159 | 0.184711  | -3.042967 |
| H | -4.905435 | -0.136314 | -0.980230 |
| H | -1.342305 | 1.627243  | 0.531013  |
| C | -0.640513 | 1.325915  | -2.154113 |
| H | -0.838312 | 1.947547  | -3.030708 |
| H | -0.195064 | 0.372684  | -2.445305 |
| H | 0.037311  | 1.828250  | -1.463990 |
| C | -4.002168 | 0.868776  | 1.477765  |
| H | -4.566847 | 1.807010  | 1.513274  |
| C | -3.048667 | 0.779831  | 2.665221  |
| H | -4.718063 | 0.041158  | 1.493557  |
| H | -2.330928 | 1.607365  | 2.653990  |
| C | -2.296043 | -0.549042 | 2.740748  |
| H | -3.657387 | 0.918804  | 3.566484  |
| S | -1.237806 | -0.559819 | 4.222465  |
| H | -1.650353 | -0.714445 | 1.873310  |
| H | -2.969878 | -1.404720 | 2.847257  |
| O | -2.027497 | -1.073906 | 5.342377  |
| O | -0.603466 | 0.758664  | 4.313933  |
| O | -0.156392 | -1.682490 | 3.860308  |
| H | 0.486027  | -1.329656 | 3.154985  |
| C | 2.222594  | -0.420229 | -0.510325 |
| C | 2.101968  | -1.372696 | -1.519676 |
| C | 3.146082  | -1.537343 | -2.435720 |
| C | 4.312108  | -0.766363 | -2.350710 |

|   |           |           |           |
|---|-----------|-----------|-----------|
| C | 4.409356  | 0.184359  | -1.319924 |
| C | 3.376834  | 0.361070  | -0.402009 |
| H | 3.053263  | -2.282742 | -3.223271 |
| C | 5.448880  | -0.956642 | -3.326977 |
| H | 5.308729  | 0.791367  | -1.236272 |
| H | 3.456207  | 1.099265  | 0.390634  |
| H | 1.202661  | -1.978375 | -1.576206 |
| S | 0.901395  | -0.189569 | 0.682072  |
| H | 6.334281  | -1.367817 | -2.824755 |
| H | 5.748629  | -0.004415 | -3.781529 |
| H | 5.173507  | -1.645077 | -4.132806 |
| O | -0.291429 | -0.913387 | 0.137243  |
| O | 0.674232  | 1.288886  | 0.752760  |
| O | 1.415827  | -0.772599 | 1.960634  |

Energy = -1902.033855472011 E<sub>h</sub>

[HSO<sub>3</sub>-pmim][HSO<sub>4</sub>]

|   |           |           |           |
|---|-----------|-----------|-----------|
| N | -0.012488 | -0.075755 | -1.749860 |
| C | 0.579736  | 1.015589  | -1.250834 |
| N | 1.837880  | 1.066183  | -1.697676 |
| C | 2.074477  | -0.052678 | -2.480966 |
| C | 0.914301  | -0.769511 | -2.515122 |
| H | 0.665507  | -1.691847 | -3.015701 |
| H | 3.032984  | -0.231753 | -2.942166 |
| H | 0.145318  | 1.706397  | -0.539822 |
| C | 2.848271  | 1.999150  | -1.185932 |
| H | 3.604323  | 2.160383  | -1.956446 |
| H | 3.289498  | 1.582263  | -0.276726 |
| H | 2.363740  | 2.944666  | -0.939848 |
| S | 1.193443  | 0.957728  | 2.088158  |
| O | 0.525666  | 0.400173  | 3.313921  |
| O | 0.105885  | 2.093030  | 1.522043  |
| O | 1.282113  | -0.060386 | 1.001872  |
| O | 2.412992  | 1.730856  | 2.313975  |
| H | -0.796492 | 1.709332  | 1.646316  |
| C | -1.319607 | -0.574089 | -1.293798 |
| H | -1.886163 | -0.900738 | -2.171567 |
| H | -1.836141 | 0.273398  | -0.841238 |
| C | -1.142776 | -1.703977 | -0.263771 |
| H | -0.289825 | -1.460380 | 0.378074  |
| H | -0.906276 | -2.643038 | -0.779222 |
| C | -2.399136 | -1.917142 | 0.585099  |
| S | -2.534814 | -0.740636 | 1.963760  |
| H | -2.406136 | -2.902129 | 1.058786  |
| H | -3.330218 | -1.804316 | 0.018210  |
| O | -1.375274 | -1.231828 | 2.918933  |



|   |           |           |          |
|---|-----------|-----------|----------|
| O | -3.833996 | -0.946973 | 2.594037 |
| O | -2.210661 | 0.609623  | 1.432543 |
| H | -0.596132 | -0.541598 | 3.064964 |

Energy = -1707.013701122237 E<sub>h</sub>

### 3. Spectral data

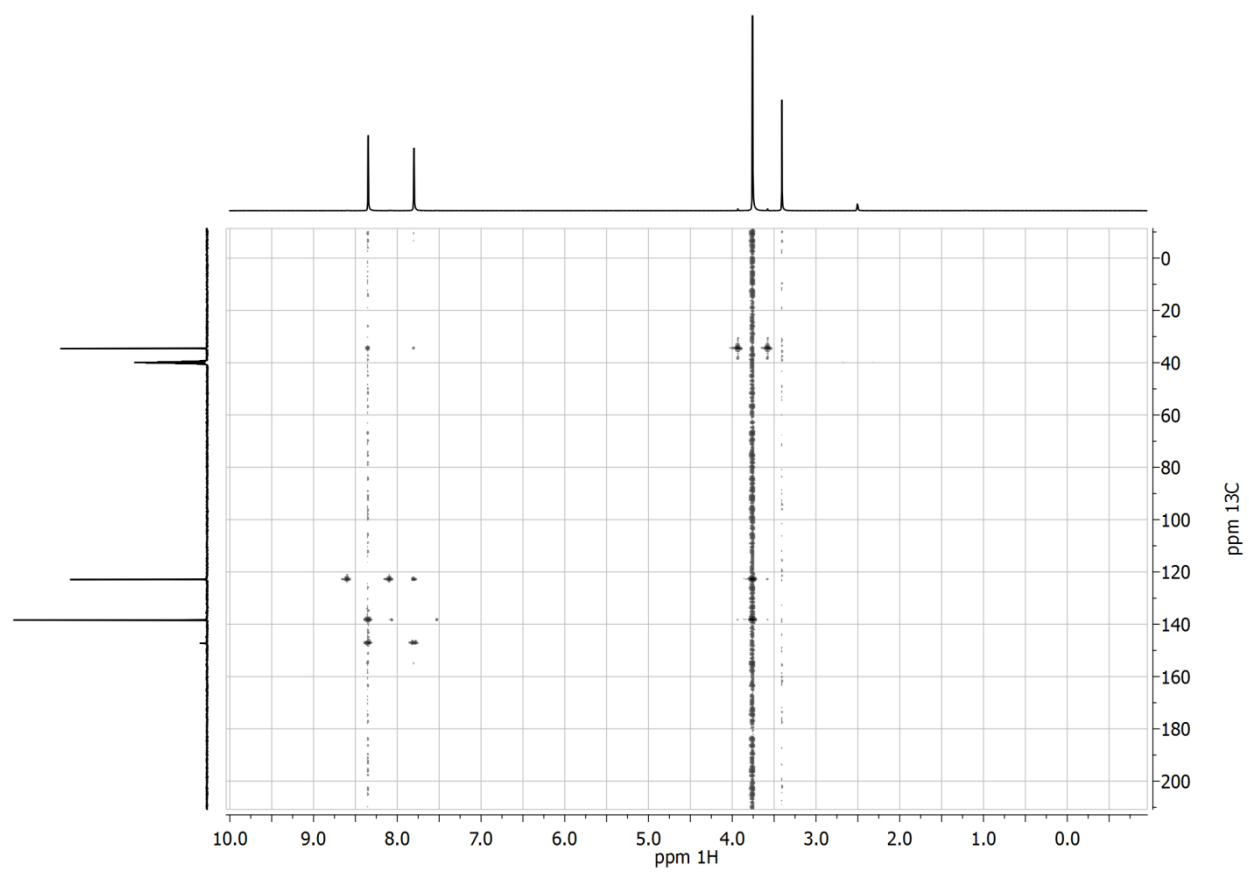

Fig. S1 HMBC analysis of 1-methyl-4-nitroimidazole in DMSO-d<sub>6</sub>.

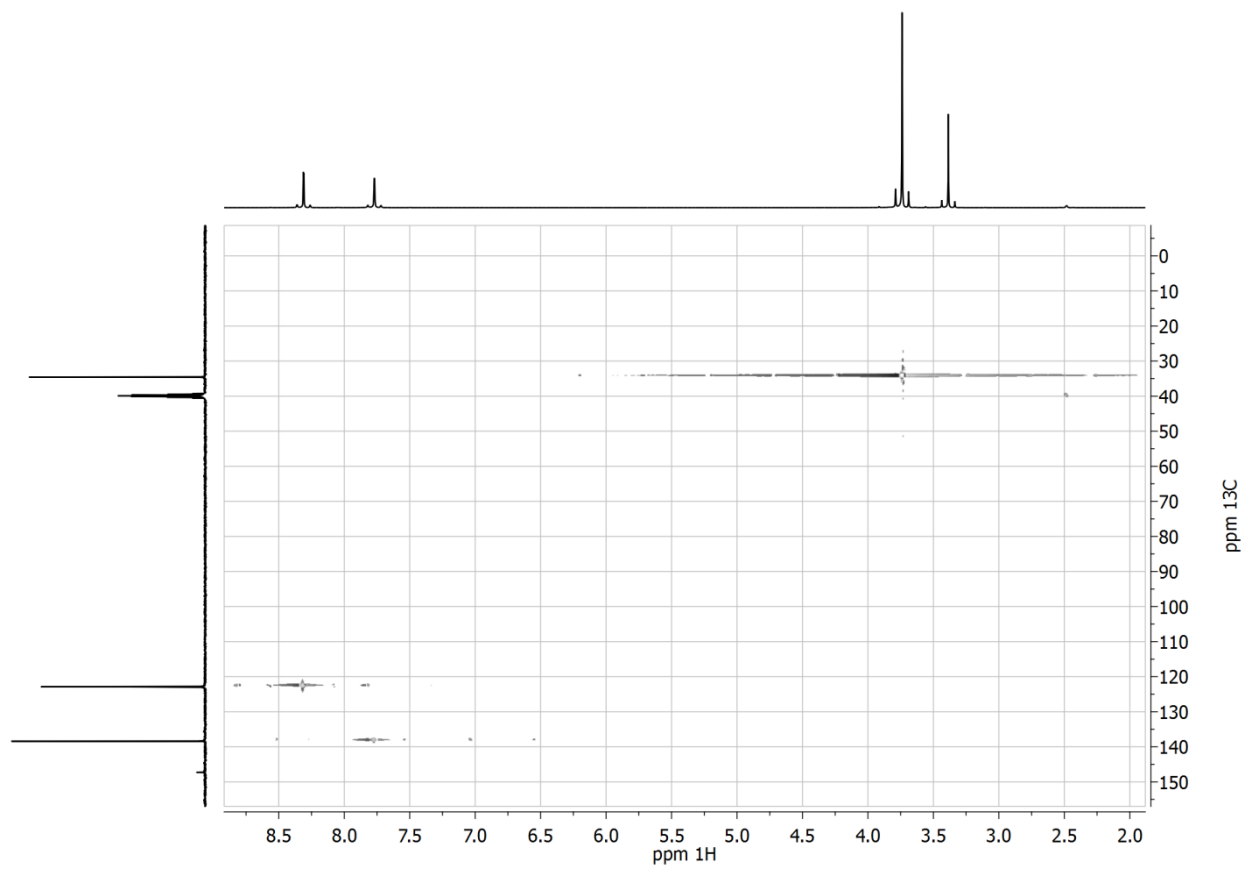

Fig. S2 HSQC analysis of 1-methyl-4-nitroimidazole in DMSO-d<sub>6</sub>.

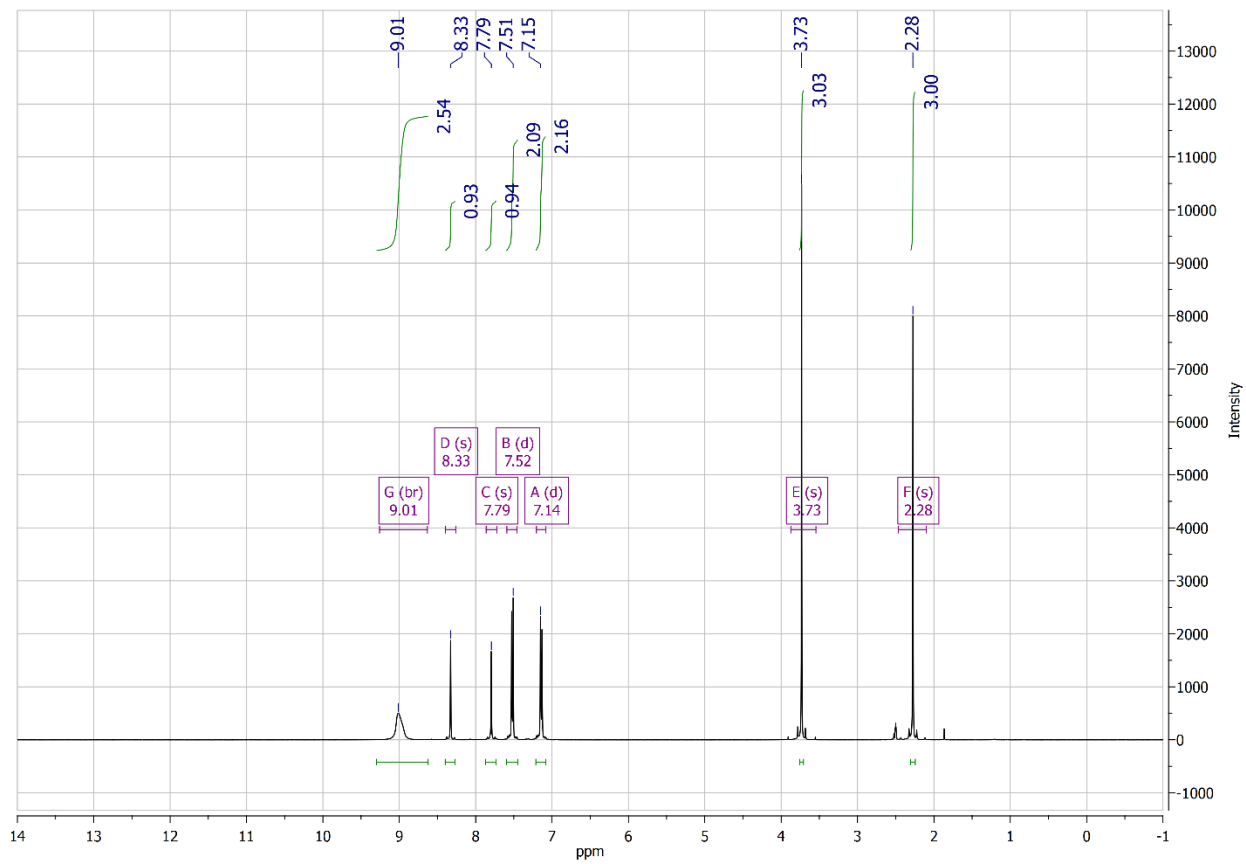

Fig. S3  $^1\text{H}$  NMR analysis of  $[\text{NO}_2\text{Hmim}][\text{TsO}]$ .  $\delta_{\text{H}}$  (400 MHz,  $\text{DMSO-d}_6$ ): 8.33 (1 H, s), 7.80 (1 H, s), 7.52 (2 H, d,  $J = 7.9$  Hz), 7.14 (2 H, d,  $J = 7.8$  Hz), 3.73 (3 H, s), 2.28 (3 H, s).

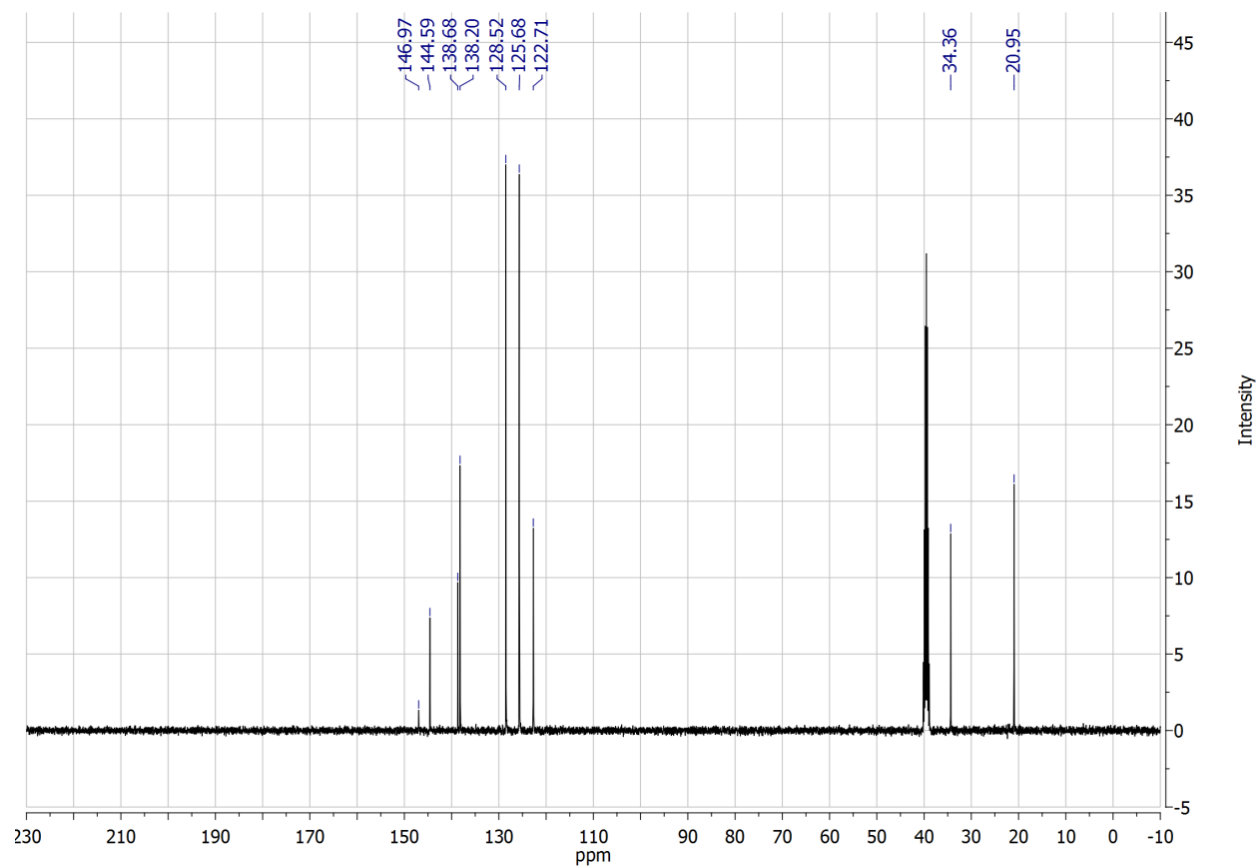

Fig. S4  $^{13}\text{C}$  NMR analysis of  $[\text{NO}_2\text{Hmim}][\text{TsO}]$ .  $\delta_{\text{C}}$  (101 MHz,  $\text{DMSO-d}_6$ ): 147.0, 144.6, 138.7, 138.2, 128.5, 125.7, 122.7, 34.4, 21.0.

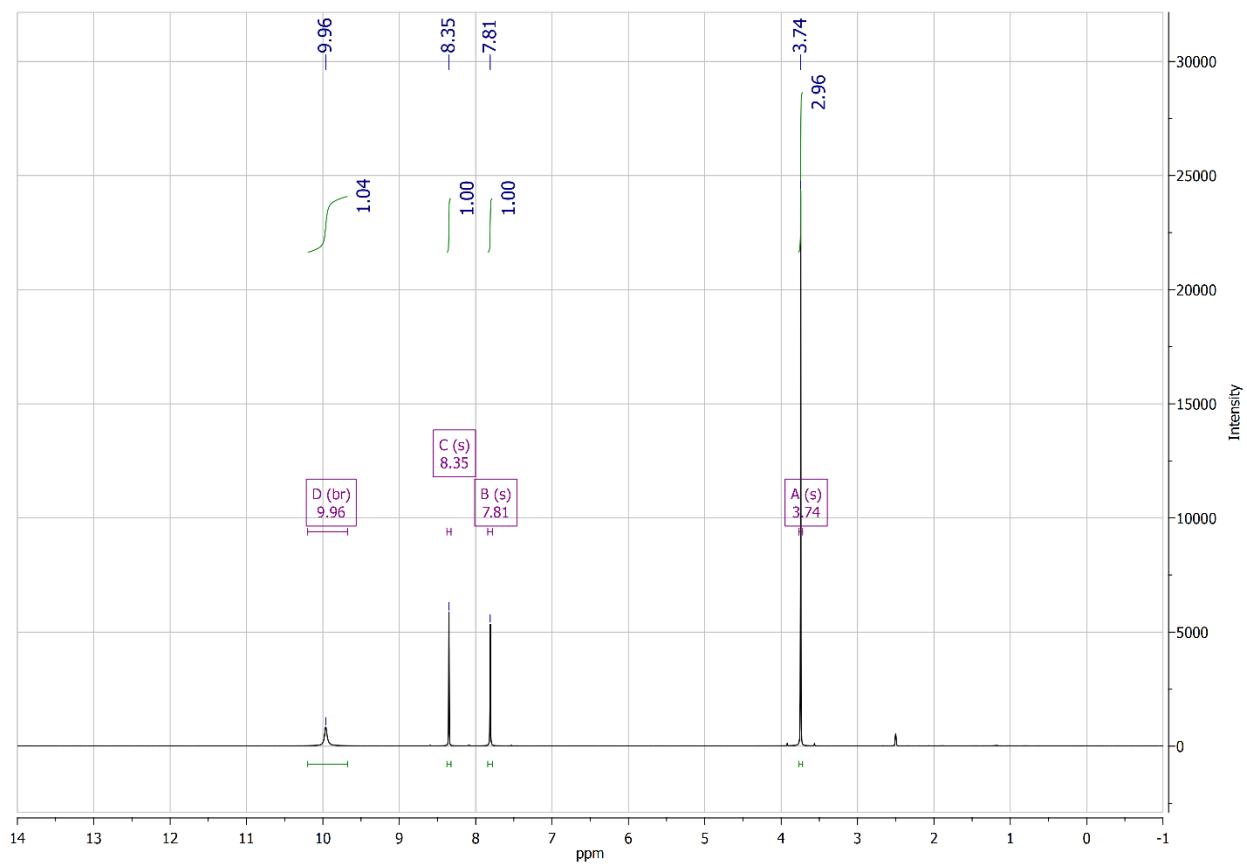

Fig. S5  $^1\text{H}$  NMR analysis of  $[\text{NO}_2\text{Hmim}]\text{Cl}$ .  $\delta_{\text{H}}$  (400 MHz,  $\text{DMSO-d}_6$ ): 9.96 (1 H, br), 8.35 (1 H, s), 7.81 (1 H, s), 3.74 (3 H, s).

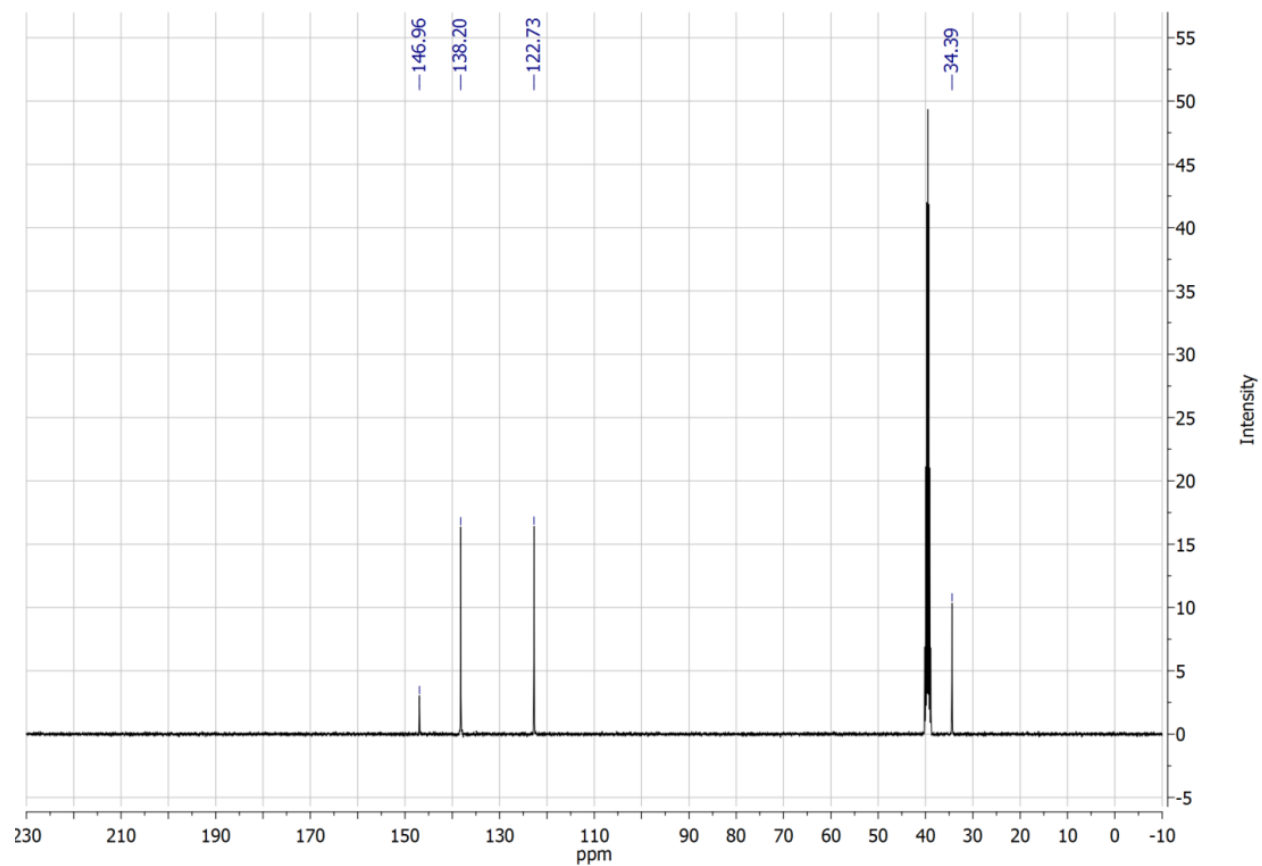

Fig. S6  $^{13}\text{C}$  NMR analysis of  $[\text{NO}_2\text{Hmim}]\text{Cl}$ .  $\delta_{\text{c}}$  (101 MHz,  $\text{DMSO-d}_6$ ): 147.0, 138.2, 122.7, 34.4.

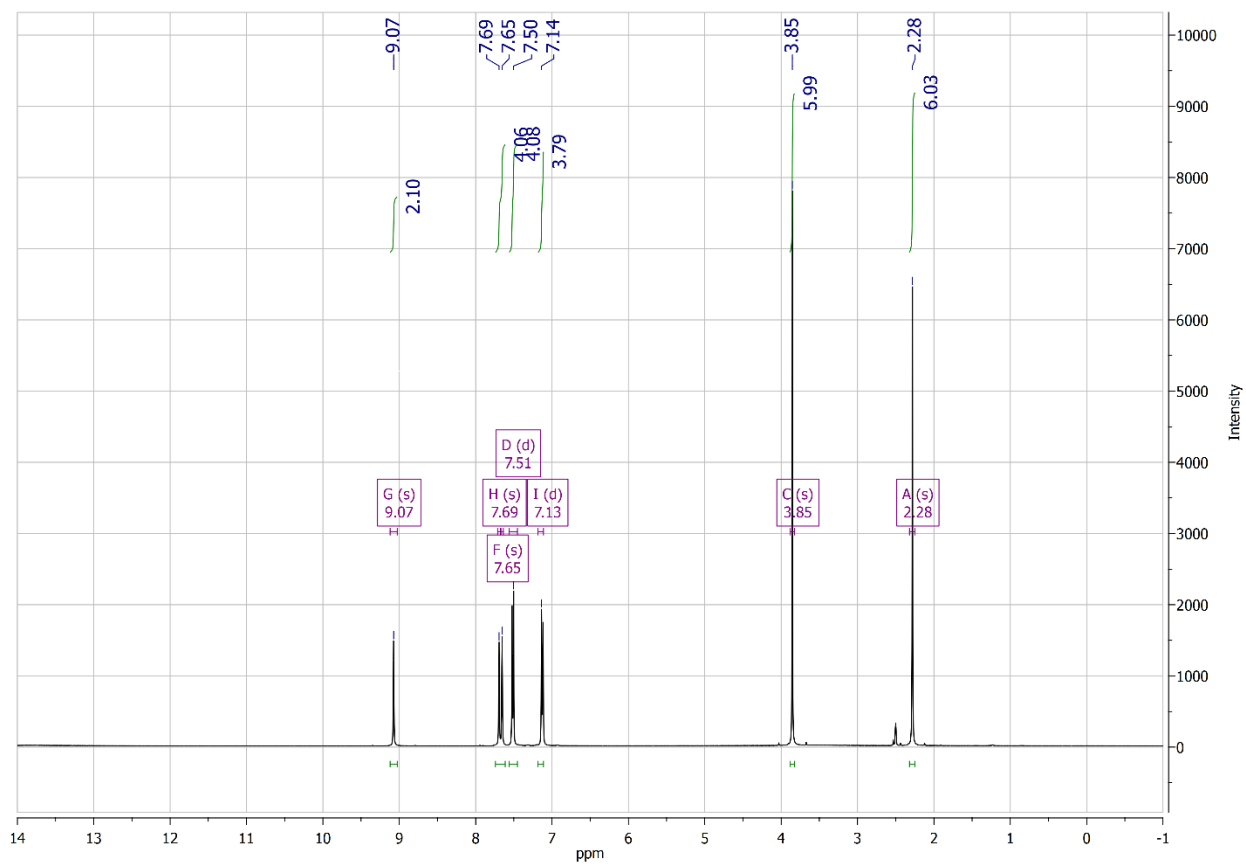

Fig. S7  $^1\text{H}$  NMR analysis of [Hmim][TsO].  $\delta_{\text{H}}$  (400 MHz, DMSO- $d_6$ ): 9.07 (1 H, s), 7.69 (1H, s), 7.65(1H, s), 7.50 (2 H, d,  $J = 8.0$  Hz), 7.14 (2 H, d,  $J = 7.9$  Hz), 3.85 (3 H, s), 2.28 (3 H, s).



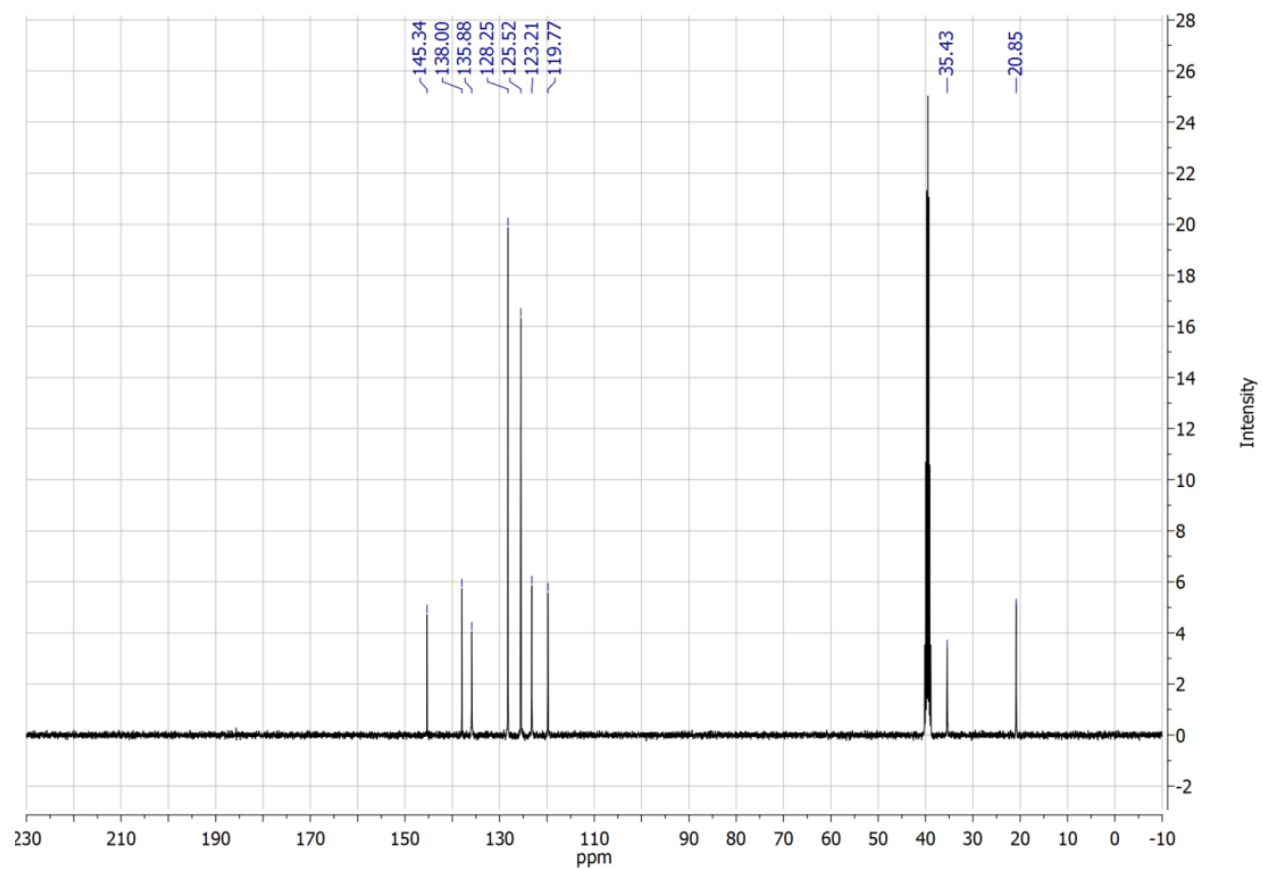

Fig. S8  $^{13}\text{C}$  NMR analysis of [Hmim][TsO].  $\delta_c$  (101 MHz, DMSO- $d_6$ ): 145.3, 138.0, 135.9, 128.3, 125.5, 123.2, 119.8, 35.4, 20.9.

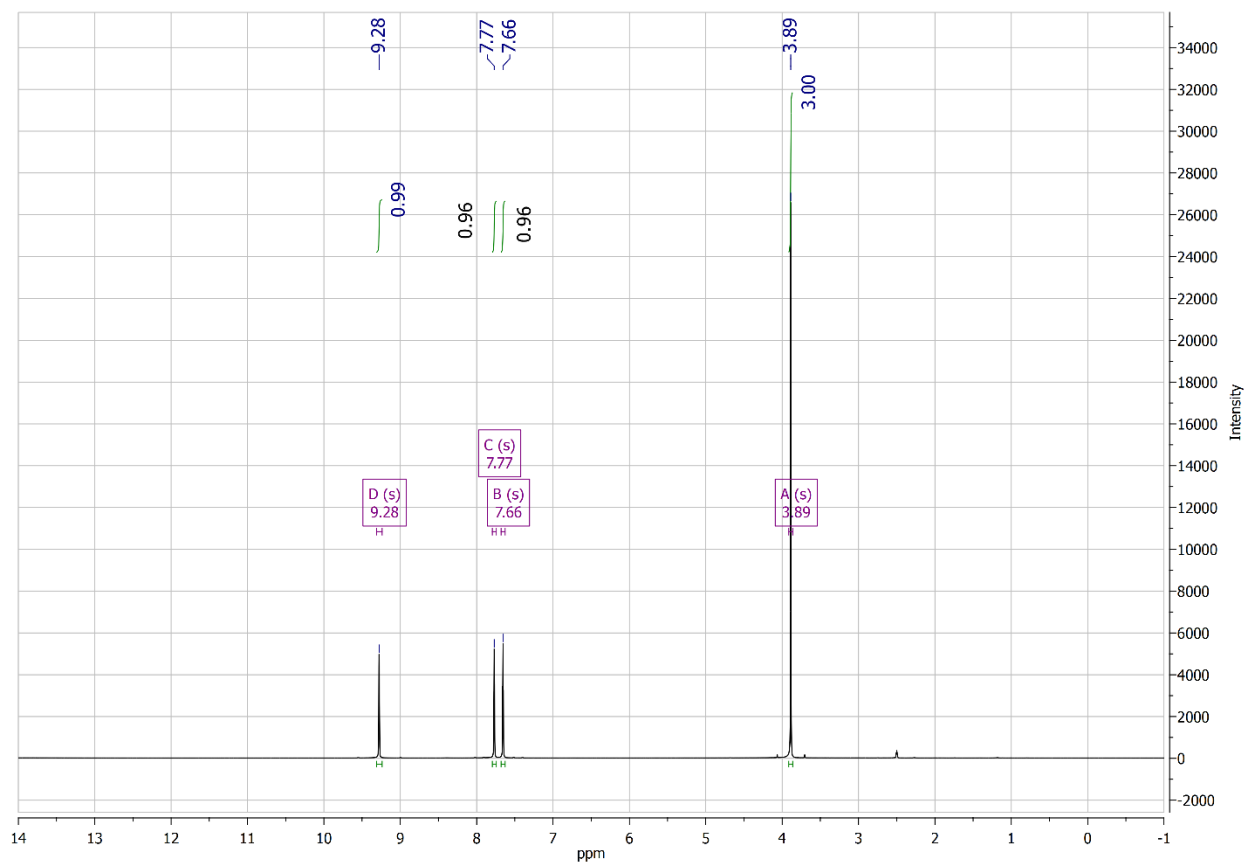

Fig. S9  $^1\text{H}$  NMR analysis of [Hmim]Cl.  $\delta_{\text{H}}$  (400 MHz, DMSO- $d_6$ ): 9.28 (1 H, s), 7.77 (1 H, s), 7.66 (1 H, s), 3.89 (3 H, s).

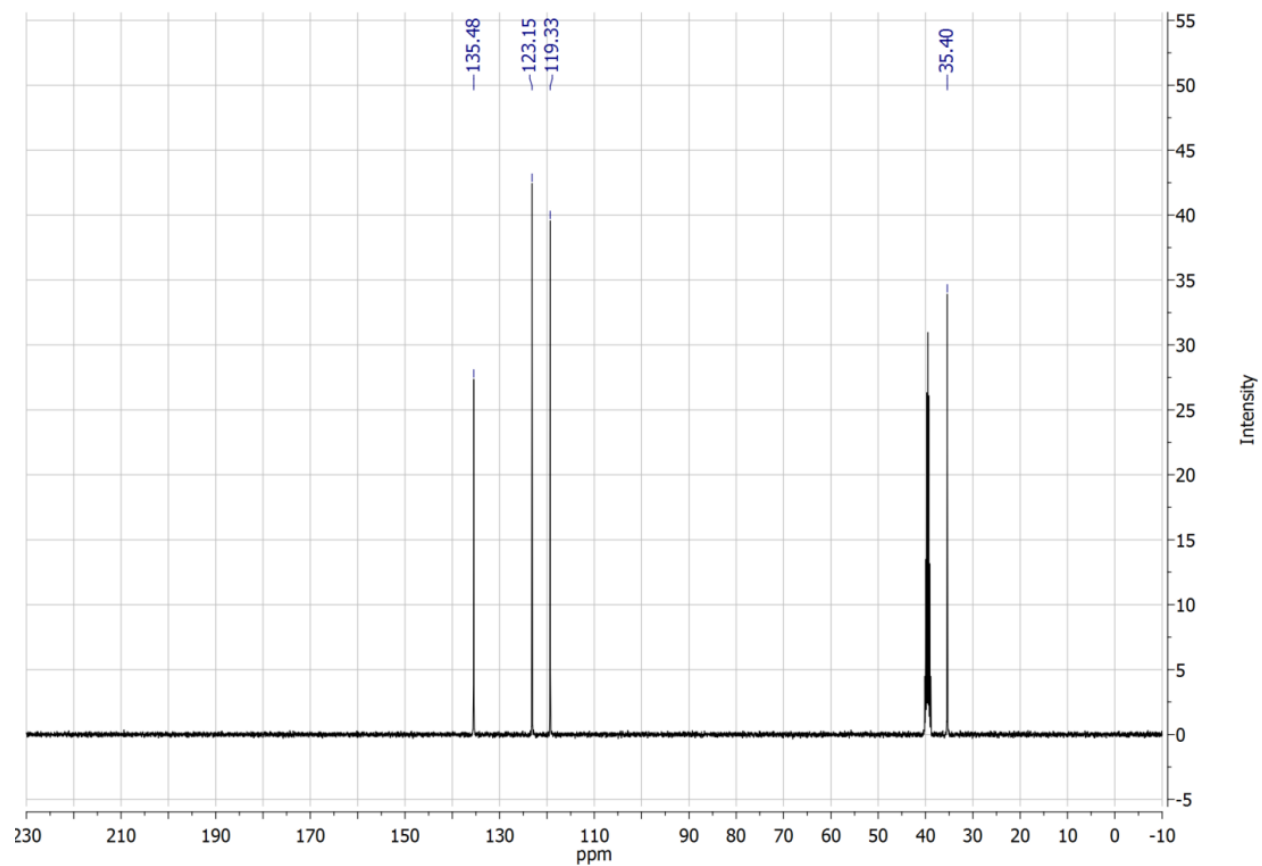

Fig. S10  $^{13}\text{C}$  NMR analysis of [Hmim]Cl.  $\delta_c$  (101 MHz, DMSO- $d_6$ ): 135.5, 123.2, 119.3, 35.4.

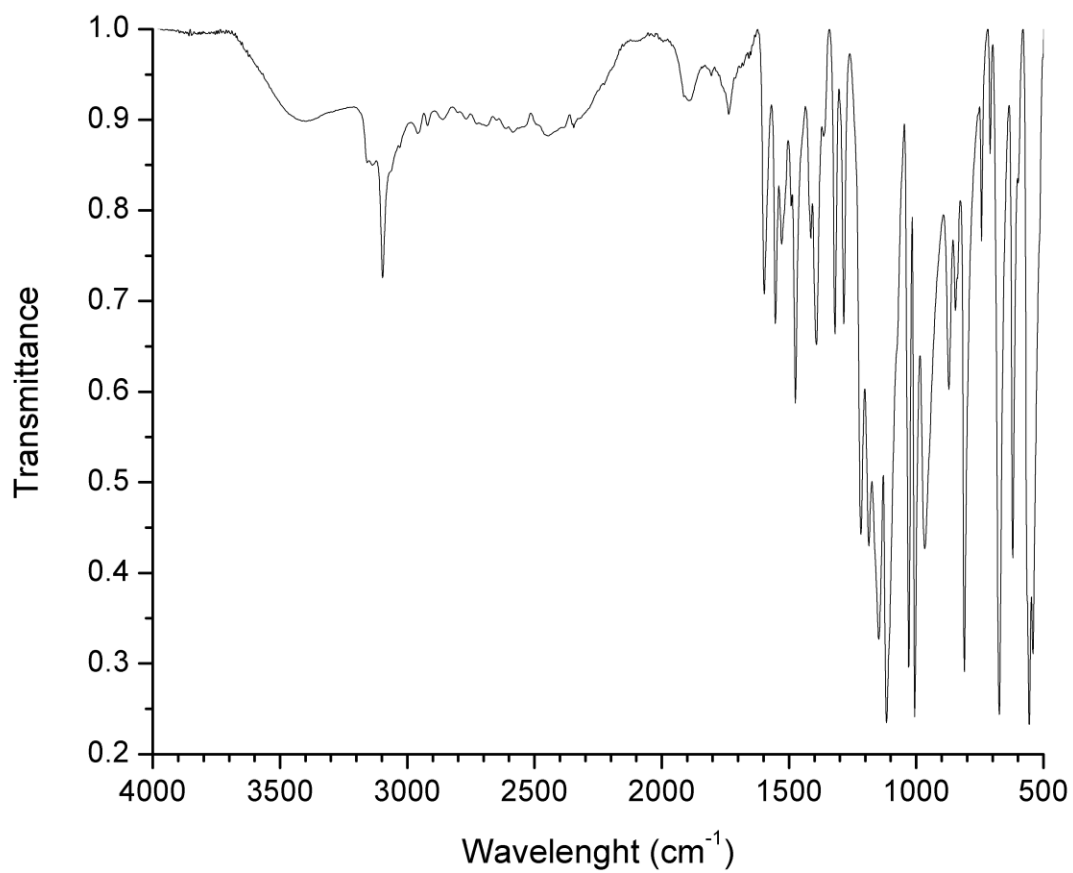

Fig. S11 ATR-FTIR analysis of [NO<sub>2</sub>Hmim][TsO].

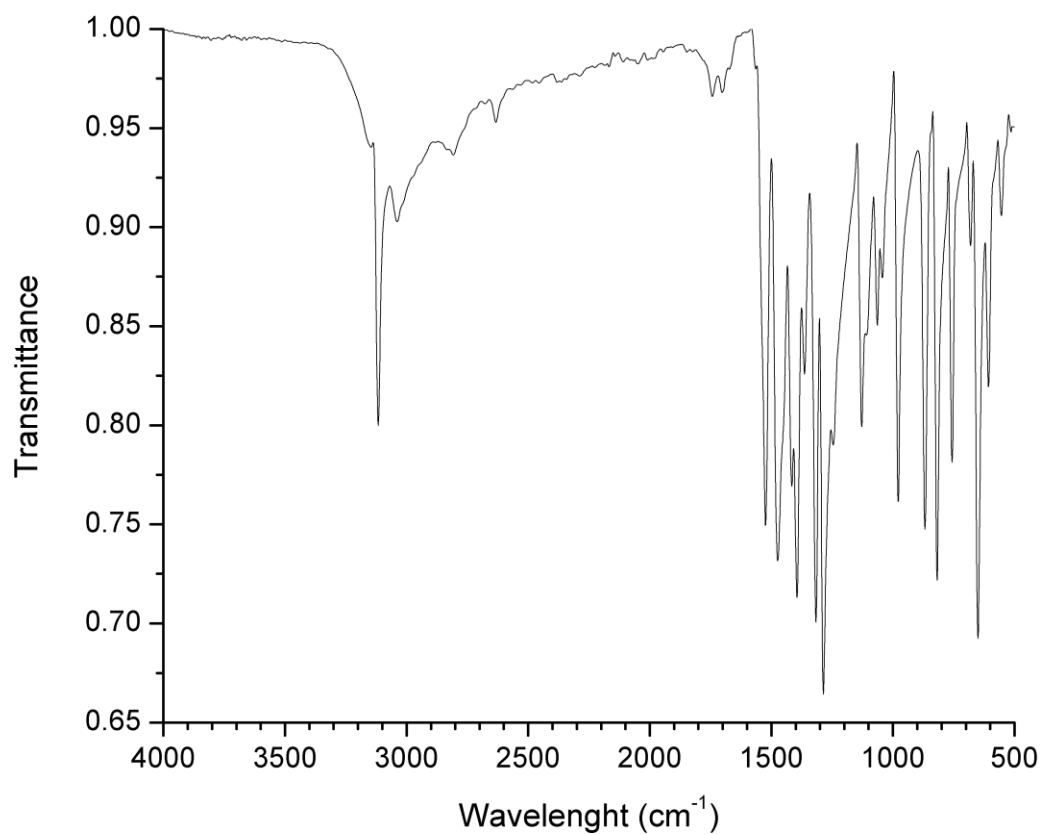

Fig. S12 ATR-FTIR analysis of [NO<sub>2</sub>Hmim]Cl.

#### 4. References

1. P. Geerlings, F. De Proft and W. Langenaeker, *Chem. Rev.*, 2003, **103**, 1793-1873.
2. L. R. Domingo, M. Ríos-Gutiérrez and P. Pérez, *Molecules*, 2016, **21**, 748.
3. P. K. Chattaraj, S. Giri and S. Duley, *Chem. Rev.*, 2011, **111**, PR43-PR75.
4. S. F. Boys and F. Bernardi, *Mol. Phys.*, 1970, **19**, 553-566.
5. F. Neese, in *Orca Manual 4.0*, <https://orcaforum.cec.mpg.de/OrcaManual.pdf>, 2017.
